# Supplementary material for: Medicinal Plants of the Australian Aboriginal Dharawal People Exhibiting Anti‐Inflammatory Activity
Source: Hindawi journal article supplement (doi:10.1155/2016/2935403), 2016-01-01
Supplement: f1 [file 2935403.f1.pdf]

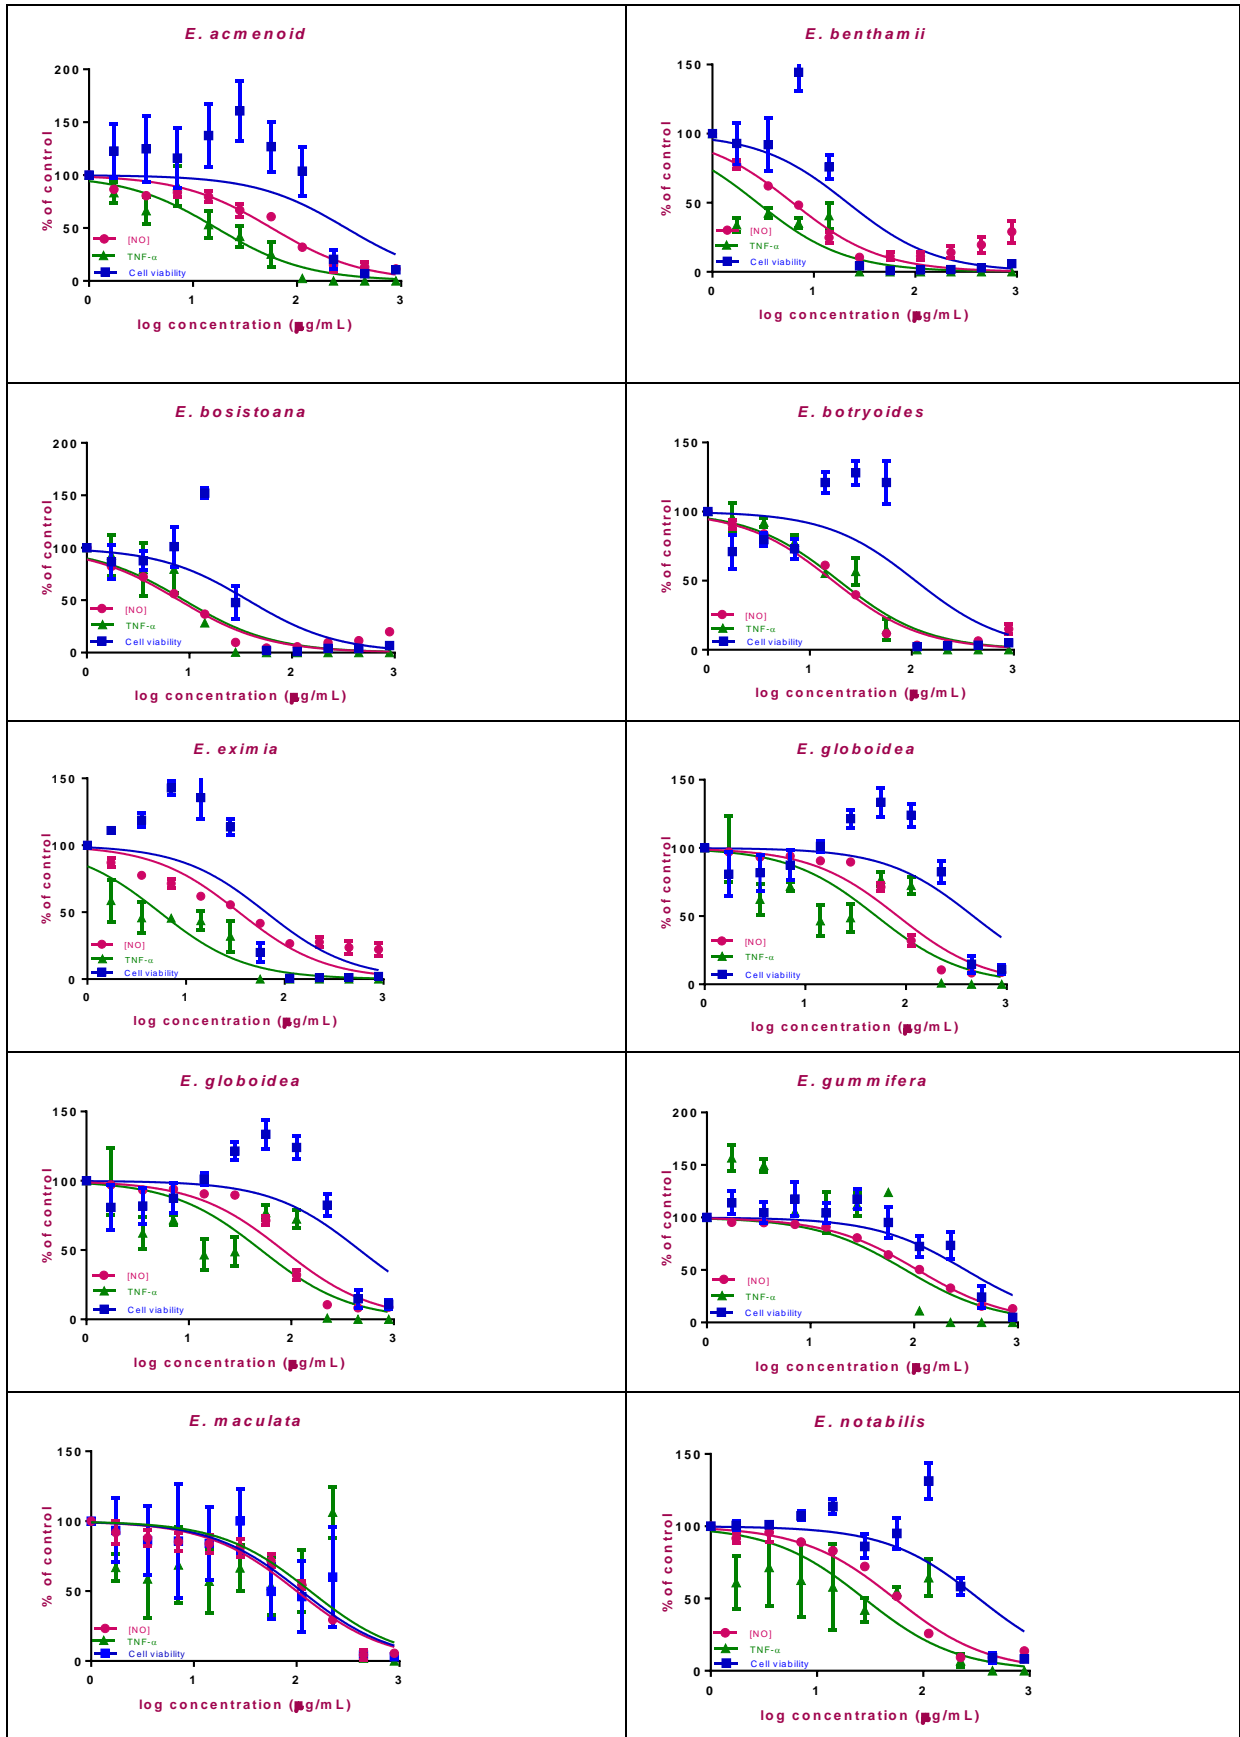

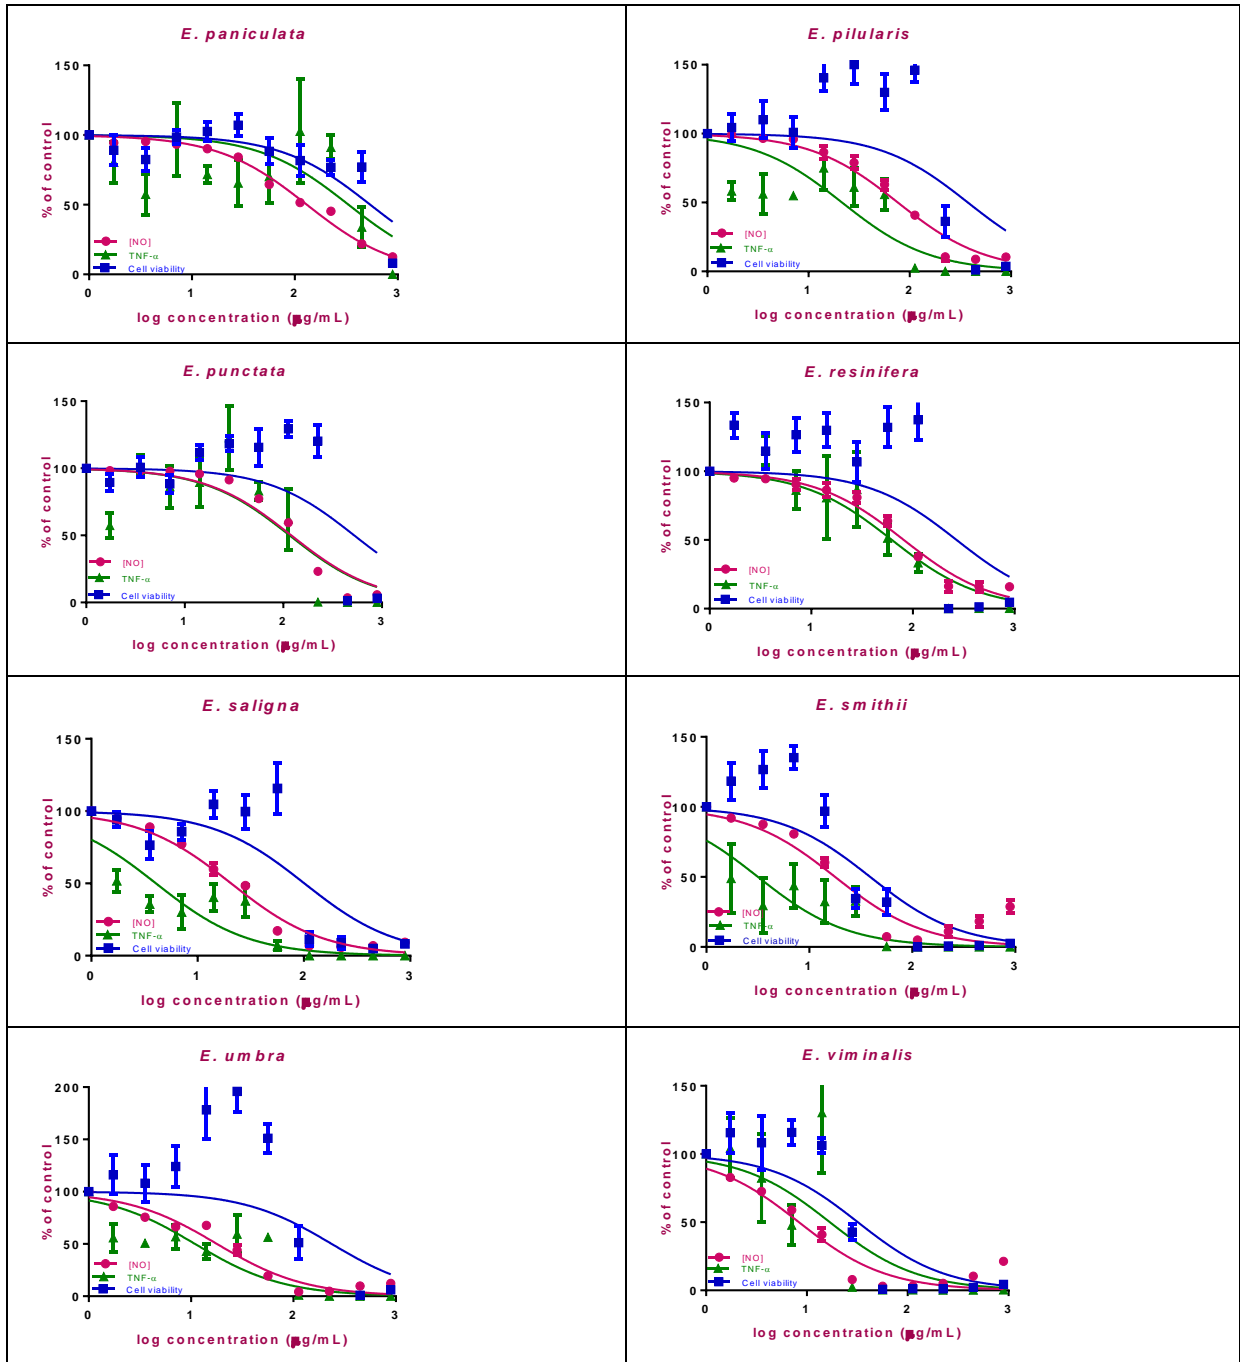

**Supplementary figure 1: Inhibition of LPS and IFN- $\gamma$  induced production of pro-inflammatory markers by ethanolic extracts from seventeen *Eucalyptus* species.**

Results are represented as mean  $\pm$  SEM of 3 experiments (in triplicate) for nitric oxide production and cell viability and one experiment (in triplicate) for TNF- $\alpha$  production.
